# Supplementary material for: Nonlinear optical properties of PtTe2 based saturable absorbers for ultrafast photonics
Source: Royal Society of Chemistry journal article supplement (doi:10.1039/d1tc05645j), 2022-01-01
Supplement: d1tc05645j1.pdf [file d1tc05645j1.pdf]

## Supporting Information

Nonlinear optical properties of PtTe<sub>2</sub> based saturable absorbers for  
ultrafast photonics

Junshan He,<sup>1,#</sup> Haiming Lu,<sup>2,#</sup> Lili Tao,<sup>2,\*</sup> Yu Zhao,<sup>2</sup> Zhaoqiang  
Zheng,<sup>2</sup> Bo Zhou<sup>1,\*</sup>

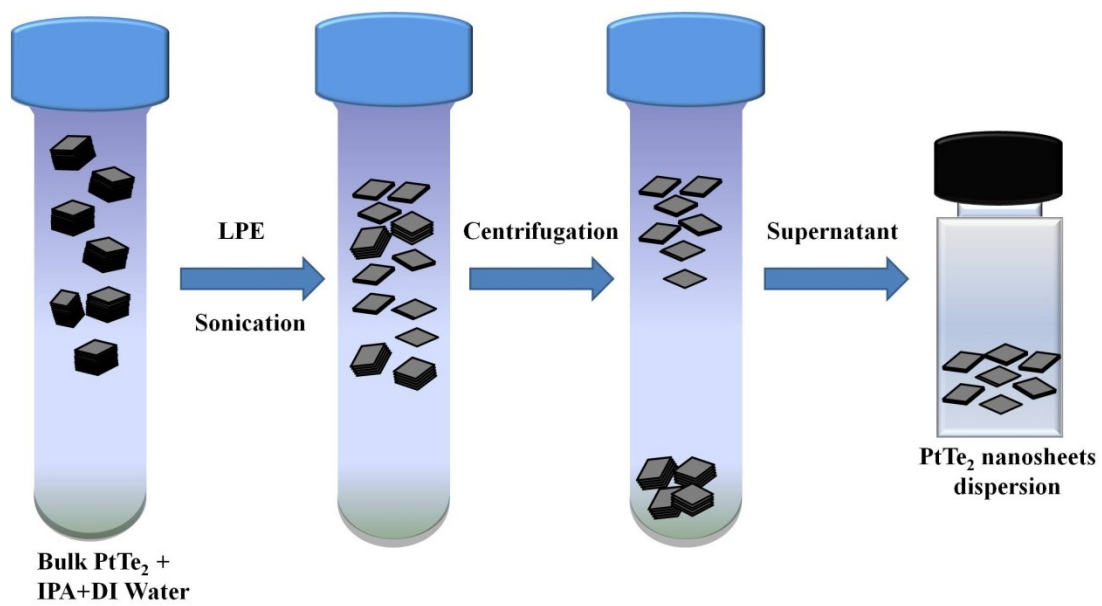

Figure S1. Schematic diagram of preparation process of PtTe<sub>2</sub> nanosheets

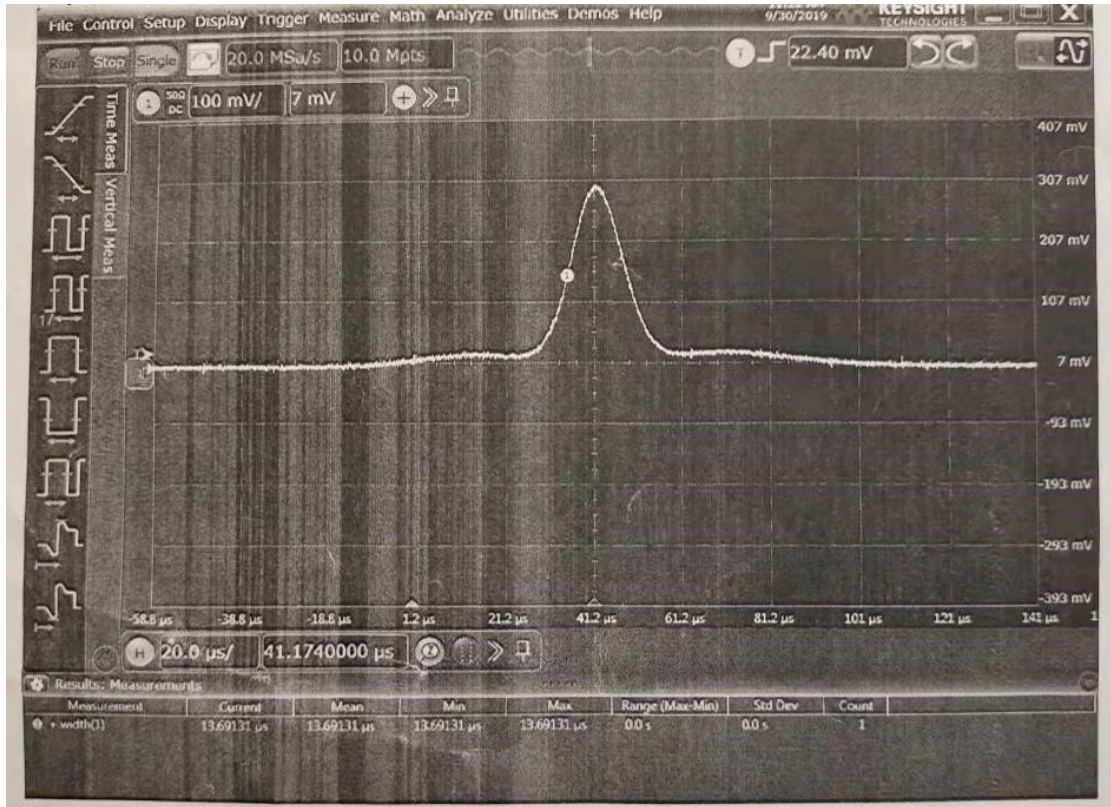

Figure S2. The pulse profile of the test laser for measurement of nonlinear optical response

Figure S2 shows the test report of the commercial 1.5 μm femtosecond laser. The pulse profile was detected by an autocorrelator (Femtochrome, FR-103XL). It can be seen that the pulse width on the oscilloscope is 13.69 μs. Based on the characteristics of the autocorrelator, the actual pulse width is  $15.5 \text{ (ps/ms)} * 13.69 * 0.707 \approx 151 \text{ fs}$ .

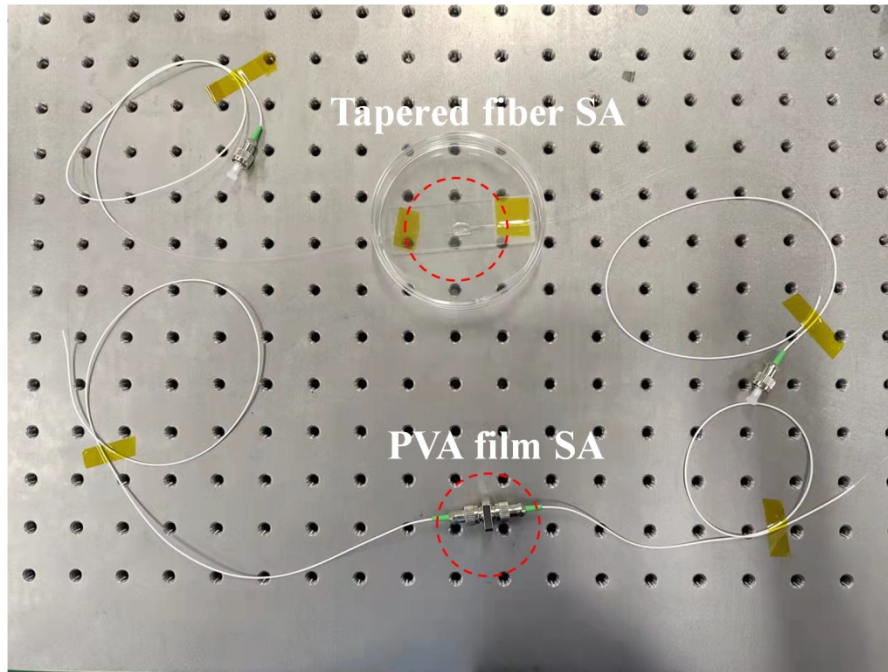

Figure S3. Insert methods of two different forms of SA

Figure S3 shows the macro view of tapered fiber SA and PVA film SA, respectively. Both ends of the samples can be fused with optical fiber connectors, which can be directly connected to the twin-detector measurement system or the laser cavity.

**(a)**

|              |                     |         |                |
|--------------|---------------------|---------|----------------|
| Equation     | $y = 1-A/(1+x/C)-B$ |         |                |
| Adj. R-Squar | 0.99082             |         |                |
|              |                     | Value   | Standard Error |
| B            | A                   | 0.00914 | 1.18471E-4     |
| B            | B                   | 0.55341 | 8.30356E-5     |
| B            | C                   | 55.7376 | 2.8276         |

**(b)**

|           |                     |         |          |
|-----------|---------------------|---------|----------|
| Equation  | $y = 1-A/(1+x/C)-B$ |         |          |
| Adj. R-Sq | 0.99686             |         |          |
|           |                     | Value   | Standard |
| B         | A                   | 0.08954 | 0.00193  |
| B         | B                   | 0.23153 | 0.00202  |
| B         | C                   | 1389.48 | 62.23606 |

Figure S4. The original data of the nonlinear fitting. (a) PVA film SA, (b) tapered fiber SA.

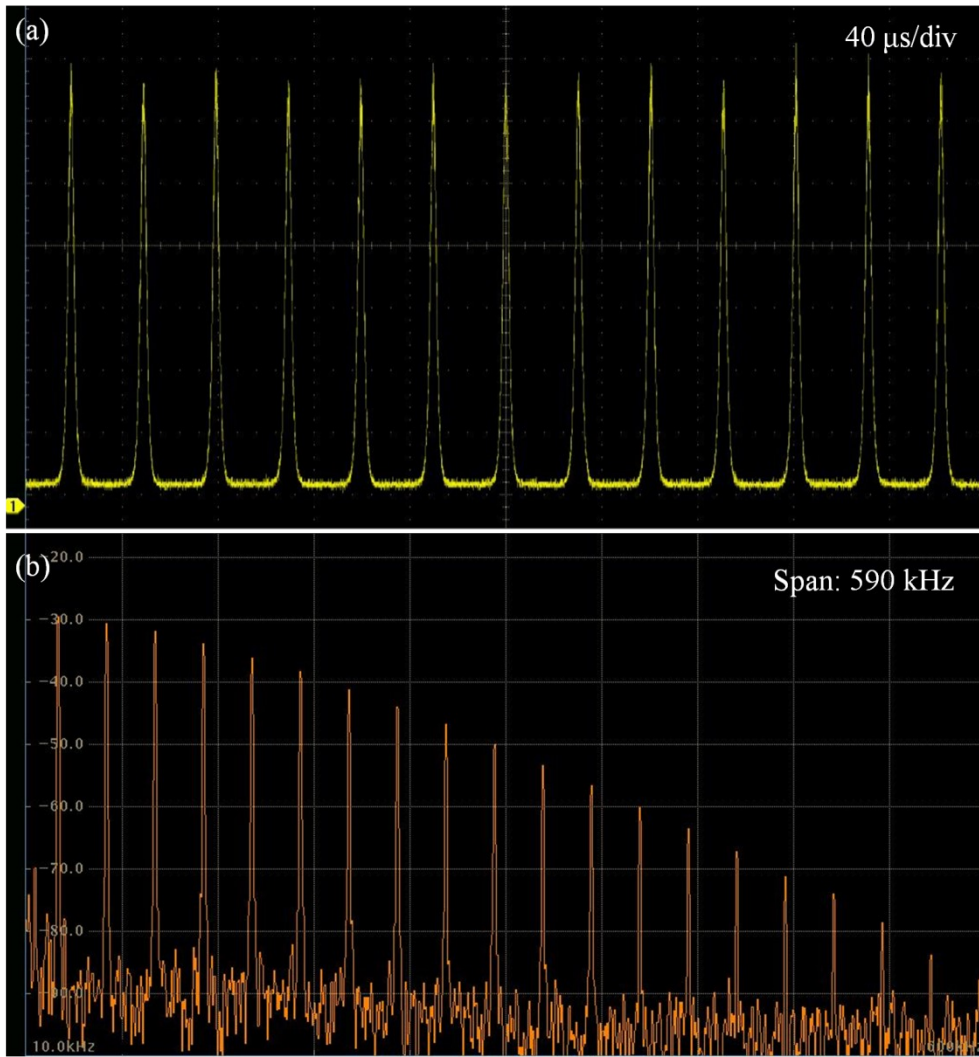

Figure S5. The output pulse train and broadband RF spectrum of the Q-switched laser at a pump power of 160 mW.

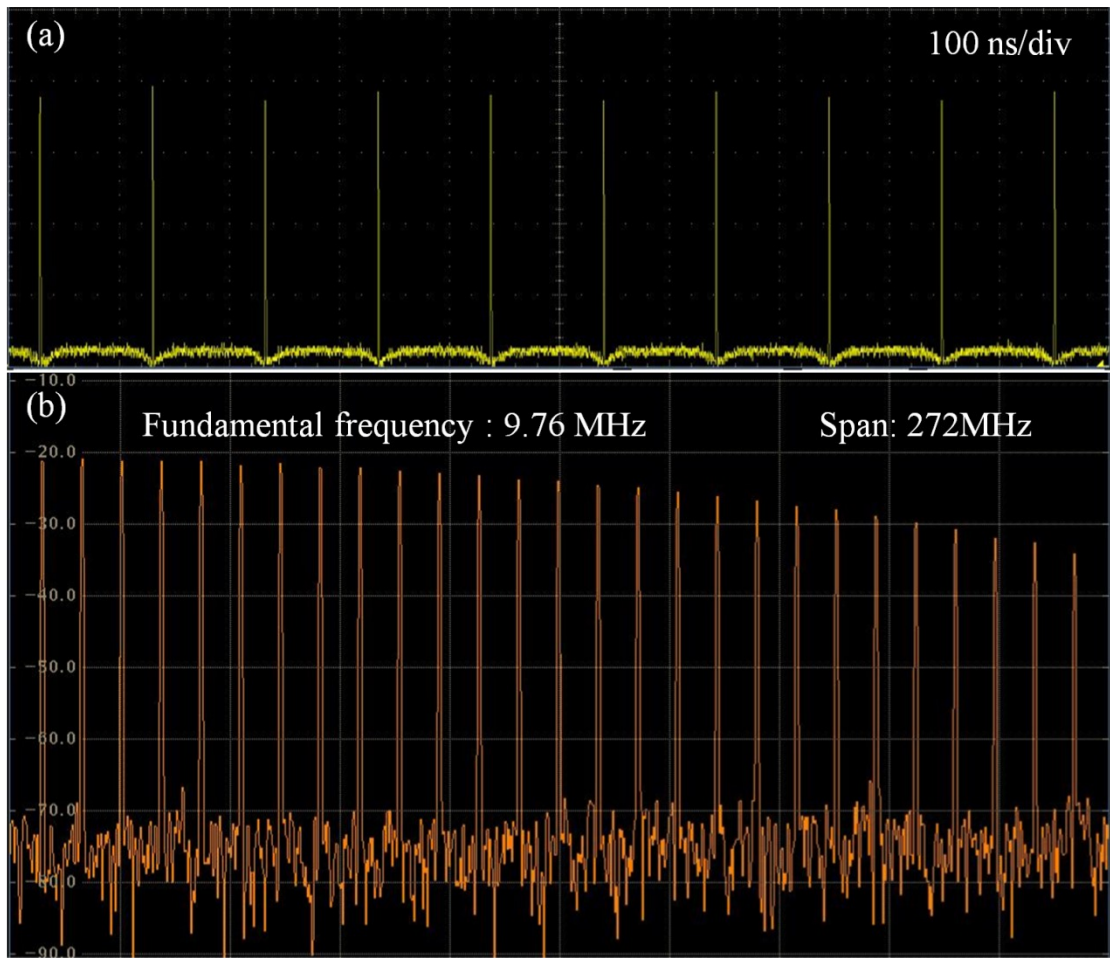

Figure S6. The output pulse train and broadband RF spectrum of the mode-locked laser

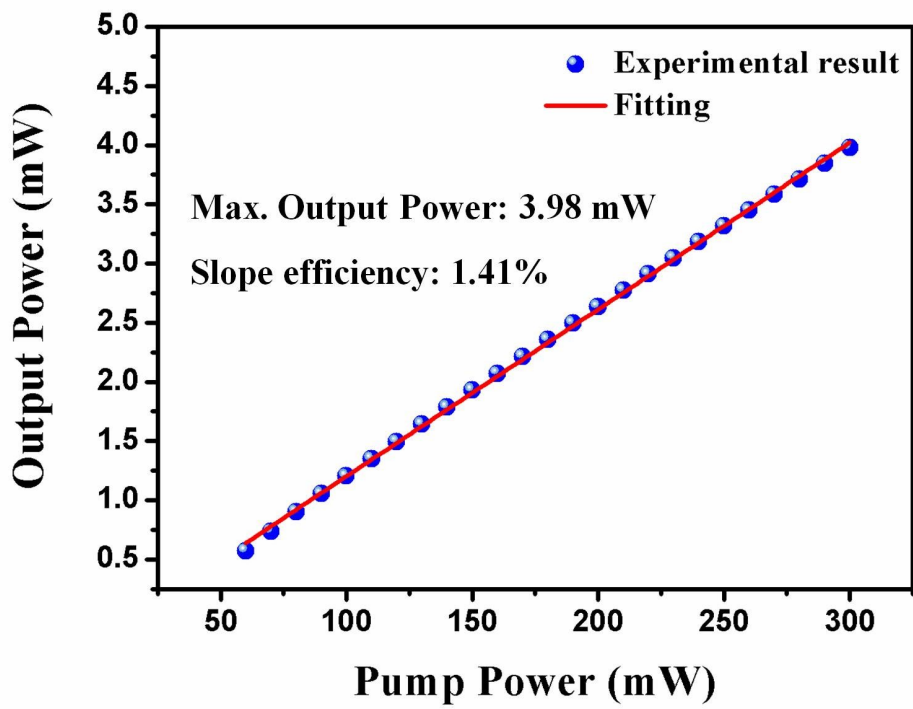

Figure S7. The curve of output power as a function of pump power of the mode-locked Er-doped fiber laser.
